# Supplementary material for: Shared Mobility Problems: A Systematic Review on Types, Variants, Characteristics, and Solution Approaches
Source: MDPI journal article supplement (doi:10.3390/app11177996), 2021-08-29
Supplement: s1 [file s1]

## Supplementary File

**Manuscript Title:** Shared Mobility Problems: A Systematic Review on Types, Variants, Characteristics, and Solution Approaches

**Table S1.** Summary of Papers based on the Types of SMP

| Paper                                          | Ridesharing | Carpooling | Taxisharing | Buspooling | Vanpooling | Multi-Modal |
|------------------------------------------------|-------------|------------|-------------|------------|------------|-------------|
| <a href="#">Agatz et al. (2011)</a>            | ✓           |            |             |            |            |             |
| <a href="#">Aissat and Oulamara (2014a)</a>    | ✓           |            |             |            |            |             |
| <a href="#">Aissat and Oulamara (2014b)</a>    | ✓           |            |             |            |            |             |
| <a href="#">Aissat and Oulamara (2015a)</a>    | ✓           |            |             |            |            |             |
| <a href="#">Aissat and Oulamara (2015b)</a>    | ✓           |            |             |            |            |             |
| <a href="#">Aissat and Oulamara (2015c)</a>    | ✓           |            |             |            |            |             |
| <a href="#">Alonso-Mora et al. (2017)</a>      | ✓           |            |             |            |            |             |
| <a href="#">Armant and Brown (2014)</a>        | ✓           |            |             |            |            |             |
| <a href="#">Armant and Brown (2020)</a>        | ✓           |            |             |            |            |             |
| <a href="#">Auad and Van Hentenryck (2021)</a> |             |            |             |            |            | ✓           |
| <a href="#">Aydin et al. (2020)</a>            | ✓           |            |             |            |            |             |
| <a href="#">Ben Cheikh et al. (2017)</a>       | ✓           |            |             |            |            |             |
| <a href="#">Bian and Liu (2017)</a>            | ✓           |            |             |            |            |             |
| <a href="#">Bian and Liu (2019a)</a>           | ✓           |            |             |            |            |             |
| <a href="#">Bian and Liu (2019b)</a>           | ✓           |            |             |            |            |             |
| <a href="#">Bit-Monnot et al. (2013)</a>       |             | ✓          |             |            |            |             |
| <a href="#">Bruck et al. (2017)</a>            |             | ✓          |             |            |            |             |
| <a href="#">Cangialosi et al. (2016)</a>       |             |            |             |            |            | ✓           |
| <a href="#">Cao et al. (2021)</a>              | ✓           |            |             |            |            |             |
| <a href="#">Cheikh &amp; Hammadi (2016)</a>    | ✓           |            |             |            |            |             |
| <a href="#">Cheikh-Graiet et al. (2020)</a>    | ✓           |            |             |            |            |             |
| <a href="#">Chen et al. (2019a)</a>            | ✓           |            |             |            |            |             |
| <a href="#">Chen et al. (2019b)</a>            |             |            | ✓           |            |            |             |
| <a href="#">Chen et al. (2019c)</a>            | ✓           |            |             |            |            |             |
| <a href="#">Chou et al. (2016)</a>             |             | ✓          |             |            |            |             |
| <a href="#">Di Febbraro et al. (2013)</a>      | ✓           |            |             |            |            |             |
| <a href="#">Du et al. (2016)</a>               |             |            | ✓           |            |            |             |
| <a href="#">Duan et al. (2018)</a>             |             | ✓          |             |            |            |             |
| <a href="#">Enzi et al. (2020)</a>             |             |            |             |            |            | ✓           |
| <a href="#">Guan et al. (2020)</a>             | ✓           |            |             |            |            |             |

|                                                 |   |   |   |   |   |   |
|-------------------------------------------------|---|---|---|---|---|---|
| <a href="#">Guo et al. (2013)</a>               |   | ✓ |   |   |   |   |
| <a href="#">Herbawi and Weber (2011a)</a>       | ✓ |   |   |   |   |   |
| <a href="#">Herbawi and Weber (2011b)</a>       | ✓ |   |   |   |   |   |
| <a href="#">Herbawi and Weber (2011c)</a>       | ✓ |   |   |   |   |   |
| <a href="#">Herbawi and Weber (2012a)</a>       | ✓ |   |   |   |   |   |
| <a href="#">Herbawi and Weber (2012b)</a>       | ✓ |   |   |   |   |   |
| <a href="#">Herbawi and Weber (2012c)</a>       | ✓ |   |   |   |   |   |
| <a href="#">Herbawi and Weber (2012d)</a>       | ✓ |   |   |   |   |   |
| <a href="#">Hosni et al. (2014)</a>             |   |   | ✓ |   |   |   |
| <a href="#">Hou et al. (2018)</a>               | ✓ |   |   |   |   |   |
| <a href="#">Hsieh and Zhan (2018)</a>           |   | ✓ |   |   |   |   |
| <a href="#">Hsieh et al. (2019)</a>             |   | ✓ |   |   |   |   |
| <a href="#">Huang et al. (2014a)</a>            |   | ✓ |   |   |   |   |
| <a href="#">Huang et al. (2014b)</a>            |   | ✓ |   |   |   |   |
| <a href="#">Huang et al. (2016)</a>             |   | ✓ |   |   |   |   |
| <a href="#">Huang et al. (2017)</a>             |   | ✓ |   |   |   |   |
| <a href="#">Huang et al. (2018a)</a>            |   | ✓ |   |   |   |   |
| <a href="#">Huang et al. (2018b)</a>            |   |   |   |   |   | ✓ |
| <a href="#">Jung et al. (2016)</a>              |   |   | ✓ |   |   |   |
| <a href="#">Kaan and Olinick (2013)</a>         |   |   |   |   | ✓ |   |
| <a href="#">Lee and Savelsbergh (2015)</a>      | ✓ |   |   |   |   |   |
| <a href="#">Li and Chung (2020)</a>             | ✓ |   |   |   |   |   |
| <a href="#">Li et al. (2018)</a>                | ✓ |   |   |   |   |   |
| <a href="#">Lin et al. (2012)</a>               |   |   | ✓ |   |   |   |
| <a href="#">Liu and Liu (2020)</a>              |   |   |   | ✓ |   |   |
| <a href="#">Liu et al. (2019)</a>               |   |   |   | ✓ |   |   |
| <a href="#">Lloret-Batlle et al. (2017)</a>     | ✓ |   |   |   |   |   |
| <a href="#">Long et al. (2018)</a>              | ✓ |   |   |   |   |   |
| <a href="#">Lotfi et al. (2019)</a>             | ✓ |   |   |   |   |   |
| <a href="#">Lu et al. (2020)</a>                | ✓ |   |   |   |   |   |
| <a href="#">Ma (2017)</a>                       |   |   |   |   |   | ✓ |
| <a href="#">Ma et al. (2018a)</a>               | ✓ |   |   |   |   |   |
| <a href="#">Ma et al. (2018b)</a>               |   |   | ✓ |   |   |   |
| <a href="#">Masoud and Jayakrishnan (2017a)</a> | ✓ |   |   |   |   |   |
| <a href="#">Masoud and Jayakrishnan (2017b)</a> | ✓ |   |   |   |   |   |
| <a href="#">Masoud et al. (2017a)</a>           |   |   |   |   |   | ✓ |
| <a href="#">Masoud et al. (2017b)</a>           | ✓ |   |   |   |   |   |

|                                                  |   |   |   |  |  |   |
|--------------------------------------------------|---|---|---|--|--|---|
| <a href="#">Massobrio et al. (2016)</a>          |   |   | ✓ |  |  |   |
| <a href="#">Najmi et al. (2017)</a>              | ✓ |   |   |  |  |   |
| <a href="#">Nam et al. (2018)</a>                |   |   |   |  |  | ✓ |
| <a href="#">Naoum-Sawaya et al. (2015)</a>       | ✓ |   |   |  |  |   |
| <a href="#">Pelzer et al. (2015)</a>             | ✓ |   |   |  |  |   |
| <a href="#">Qian et al. (2017)</a>               |   |   | ✓ |  |  |   |
| <a href="#">Regue et al. (2016)</a>              |   |   |   |  |  | ✓ |
| <a href="#">Ren et al. (2020)</a>                | ✓ |   |   |  |  |   |
| <a href="#">Santos and Xavier (2013)</a>         |   |   | ✓ |  |  |   |
| <a href="#">Santos and Xavier (2015)</a>         |   |   | ✓ |  |  |   |
| <a href="#">Simonetto et al. (2019)</a>          | ✓ |   |   |  |  |   |
| <a href="#">Smet (2019)</a>                      | ✓ |   |   |  |  |   |
| <a href="#">Stiglic et al. (2015)</a>            | ✓ |   |   |  |  |   |
| <a href="#">Stiglic et al. (2016)</a>            | ✓ |   |   |  |  |   |
| <a href="#">Stiglic et al. (2018)</a>            |   |   |   |  |  | ✓ |
| <a href="#">Su et al. (2019)</a>                 |   | ✓ |   |  |  |   |
| <a href="#">Sun and Zhang (2018)</a>             |   |   | ✓ |  |  |   |
| <a href="#">Tafreshian and Masoud (2020a)</a>    | ✓ |   |   |  |  |   |
| <a href="#">Tafreshian and Masoud (2020b)</a>    | ✓ |   |   |  |  |   |
| <a href="#">Tamannaei &amp; Irandoost (2019)</a> |   | ✓ |   |  |  |   |
| <a href="#">Wang et al. (2018)</a>               | ✓ |   |   |  |  |   |
| <a href="#">Wang et al. (2016)</a>               | ✓ |   |   |  |  |   |
| <a href="#">Wu et al. (2016)</a>                 |   | ✓ |   |  |  |   |
| <a href="#">Xia et al. (2015)</a>                |   | ✓ |   |  |  |   |
| <a href="#">Yan and Chen (2011a)</a>             |   | ✓ |   |  |  |   |
| <a href="#">Yan and Chen (2011b)</a>             |   | ✓ |   |  |  |   |
| <a href="#">Yan et al. (2011)</a>                |   | ✓ |   |  |  |   |
| <a href="#">Yan et al. (2012)</a>                |   | ✓ |   |  |  |   |
| <a href="#">Yan et al. (2014)</a>                |   | ✓ |   |  |  |   |
| <a href="#">Ye et al. (2015)</a>                 |   |   | ✓ |  |  |   |
| <a href="#">Yu et al. (2019)</a>                 | ✓ |   |   |  |  |   |
| <a href="#">Yu et al. (2020)</a>                 |   |   |   |  |  | ✓ |
| <a href="#">Zhang and Zhang (2020)</a>           | ✓ |   |   |  |  |   |
| <a href="#">Zhang et al. (2019)</a>              | ✓ |   |   |  |  |   |
| <a href="#">Zhang et al. (2020)</a>              |   |   | ✓ |  |  |   |
| <a href="#">Zhao et al. (2018)</a>               | ✓ |   |   |  |  |   |

**Table S2.** Summary of Papers based on the Problem Variants of SMP

| Paper                                       | Riders and Drivers |     |     |     | Origins and Destinations |      |      |      |
|---------------------------------------------|--------------------|-----|-----|-----|--------------------------|------|------|------|
|                                             | 1-1                | 1-M | M-1 | M-M | MO1D                     | 1OMD | MOMD | 1O1D |
| <a href="#">Agatz et al. (2011)</a>         | ✓                  |     |     |     |                          |      |      |      |
| <a href="#">Aissat and Oulamara (2014b)</a> | ✓                  |     |     |     |                          |      |      |      |
| <a href="#">Aissat and Oulamara (2014a)</a> | ✓                  |     |     |     |                          |      |      |      |
| <a href="#">Aissat and Oulamara (2015a)</a> | ✓                  |     |     |     |                          |      |      |      |
| <a href="#">Aissat and Oulamara (2015b)</a> | ✓                  |     |     |     |                          |      |      |      |
| <a href="#">Aissat and Oulamara (2015c)</a> | ✓                  |     |     |     |                          |      |      |      |
| <a href="#">Alonso-Mora et al. (2017)</a>   |                    | ✓   |     |     |                          |      |      |      |
| <a href="#">Armant and Brown (2014)</a>     |                    | ✓   |     |     |                          |      |      |      |
| <a href="#">Armant and Brown (2020)</a>     |                    | ✓   |     |     |                          |      |      |      |
| <a href="#">Aydin et al. (2020)</a>         | ✓                  |     |     |     |                          |      |      |      |
| <a href="#">Ben Cheikh et al. (2017)</a>    |                    |     |     | ✓   |                          |      |      |      |
| <a href="#">Bian and Liu (2017)</a>         |                    | ✓   |     |     |                          |      |      |      |
| <a href="#">Bian and Liu (2019a)</a>        |                    | ✓   |     |     |                          |      |      |      |
| <a href="#">Bian and Liu (2019b)</a>        |                    | ✓   |     |     |                          |      |      |      |
| <a href="#">Bit-Monnot et al. (2013)</a>    |                    | ✓   |     |     |                          |      |      |      |
| <a href="#">Bruck et al. (2017)</a>         | ✓                  |     |     |     |                          |      |      |      |
| <a href="#">Cao et al. (2021)</a>           |                    | ✓   |     |     |                          |      |      |      |
| <a href="#">Cheikh-Graiet et al. (2020)</a> |                    |     |     | ✓   |                          |      |      |      |
| <a href="#">Cheikh &amp; Hammadi (2016)</a> |                    |     | ✓   |     |                          |      |      |      |
| <a href="#">Chen et al. (2019a)</a>         |                    |     |     | ✓   |                          |      |      |      |

|                                            |   |   |   |   |   |   |   |  |
|--------------------------------------------|---|---|---|---|---|---|---|--|
| <a href="#">Chen et al. (2019b)</a>        |   |   |   |   |   |   | ✓ |  |
| <a href="#">Chen et al. (2019c)</a>        |   | ✓ |   |   |   |   |   |  |
| <a href="#">Chou et al. (2016)</a>         |   |   | ✓ |   |   |   |   |  |
| <a href="#">Di Febbraro et al. (2013)</a>  |   | ✓ |   |   |   |   |   |  |
| <a href="#">Du et al. (2016)</a>           | ✓ |   |   |   |   |   |   |  |
| <a href="#">Duan et al. (2018)</a>         | ✓ |   |   |   |   |   |   |  |
| <a href="#">Guan et al. (2020)</a>         | ✓ |   |   |   |   |   |   |  |
| <a href="#">Guo et al. (2013)</a>          |   |   |   |   |   | ✓ |   |  |
| <a href="#">Herbawi and Weber (2011c)</a>  |   |   | ✓ |   |   |   |   |  |
| <a href="#">Herbawi and Weber (2011b)</a>  |   | ✓ |   |   |   |   |   |  |
| <a href="#">Herbawi and Weber (2011a)</a>  |   | ✓ |   |   |   |   |   |  |
| <a href="#">Herbawi and Weber (2012d)</a>  |   | ✓ |   |   |   |   |   |  |
| <a href="#">Herbawi and Weber (2012b)</a>  |   |   | ✓ |   |   |   |   |  |
| <a href="#">Herbawi and Weber (2012a)</a>  |   | ✓ |   |   |   |   |   |  |
| <a href="#">Herbawi and Weber (2012c)</a>  |   |   |   | ✓ |   |   |   |  |
| <a href="#">Hosni et al. (2014)</a>        |   | ✓ |   |   |   |   |   |  |
| <a href="#">Hou et al. (2018)</a>          |   | ✓ |   |   |   |   |   |  |
| <a href="#">Hsieh and Zhan (2018)</a>      | ✓ |   |   |   |   |   |   |  |
| <a href="#">Hsieh et al. (2019)</a>        |   | ✓ |   |   |   |   |   |  |
| <a href="#">Huang et al. (2014a)</a>       |   | ✓ |   |   |   |   |   |  |
| <a href="#">Huang et al. (2014b)</a>       |   | ✓ |   |   |   |   |   |  |
| <a href="#">Huang et al. (2016)</a>        |   |   |   |   | ✓ |   |   |  |
| <a href="#">Huang et al. (2017)</a>        |   | ✓ |   |   |   |   |   |  |
| <a href="#">Huang et al. (2018a)</a>       |   | ✓ |   |   |   |   |   |  |
| <a href="#">Jung et al. (2016)</a>         |   | ✓ |   |   |   |   |   |  |
| <a href="#">Kaan and Olinick (2013)</a>    |   | ✓ |   |   |   |   |   |  |
| <a href="#">Lee and Savelsbergh (2015)</a> | ✓ |   |   |   |   |   |   |  |
| <a href="#">Li and Chung (2020)</a>        |   |   |   | ✓ |   |   |   |  |
| <a href="#">Li et al. (2018)</a>           |   | ✓ |   |   |   |   |   |  |
| <a href="#">Lin et al. (2012)</a>          |   | ✓ |   |   |   |   |   |  |

|                                                  |   |   |   |   |   |   |   |  |
|--------------------------------------------------|---|---|---|---|---|---|---|--|
| <a href="#">Liu and Liu (2020)</a>               | ✓ |   |   |   |   |   |   |  |
| <a href="#">Liu et al. (2019)</a>                |   | ✓ |   |   |   |   |   |  |
| <a href="#">Lloret-Batlle et al. (2017)</a>      | ✓ |   |   |   |   |   |   |  |
| <a href="#">Long et al. (2018)</a>               | ✓ |   |   |   |   |   |   |  |
| <a href="#">Lotfi et al. (2019)</a>              |   |   |   | ✓ |   |   |   |  |
| <a href="#">Lu et al. (2020)</a>                 |   |   |   | ✓ |   |   |   |  |
| <a href="#">Ma et al. (2018a)</a>                |   | ✓ |   |   |   |   |   |  |
| <a href="#">Ma et al. (2018b)</a>                |   | ✓ |   |   |   |   |   |  |
| <a href="#">Masoud and Jayakrishnan (2017a)</a>  |   |   |   | ✓ |   |   |   |  |
| <a href="#">Masoud and Jayakrishnan (2017b)</a>  |   |   | ✓ | ✓ |   |   |   |  |
| <a href="#">Masoud et al. (2017b)</a>            | ✓ | ✓ |   | ✓ |   |   |   |  |
| <a href="#">Massobrio et al. (2016)</a>          |   |   |   |   |   | ✓ |   |  |
| <a href="#">Najmi et al. (2017)</a>              | ✓ |   |   |   |   |   |   |  |
| <a href="#">Naoum-Sawaya et al. (2015)</a>       | ✓ |   |   |   |   |   |   |  |
| <a href="#">Pelzer et al. (2015)</a>             | ✓ |   |   |   |   |   |   |  |
| <a href="#">Qian et al. (2017)</a>               | ✓ |   |   |   |   |   |   |  |
| <a href="#">Ren et al. (2020)</a>                |   | ✓ |   |   |   |   |   |  |
| <a href="#">Santos and Xavier (2013)</a>         |   |   |   | ✓ |   |   |   |  |
| <a href="#">Santos and Xavier (2015)</a>         |   |   |   | ✓ |   |   |   |  |
| <a href="#">Simonetto et al. (2019)</a>          | ✓ | ✓ |   |   |   |   |   |  |
| <a href="#">Stiglic et al. (2015)</a>            |   | ✓ |   |   |   |   |   |  |
| <a href="#">Stiglic et al. (2016)</a>            | ✓ |   |   |   |   |   |   |  |
| <a href="#">Smet (2019)</a>                      |   |   |   |   |   |   | ✓ |  |
| <a href="#">Su et al. (2019)</a>                 |   |   |   |   | ✓ |   |   |  |
| <a href="#">Sun and Zhang (2018)</a>             |   | ✓ |   |   |   |   |   |  |
| <a href="#">Tafreshian and Masoud (2020a)</a>    | ✓ | ✓ |   |   |   |   |   |  |
| <a href="#">Tafreshian and Masoud (2020b)</a>    | ✓ |   |   |   |   |   |   |  |
| <a href="#">Tamannaie &amp; Irandoost (2019)</a> |   | ✓ |   |   |   |   |   |  |
| <a href="#">Wang et al. (2018)</a>               | ✓ |   |   |   |   |   |   |  |
| <a href="#">Wang et al. (2016)</a>               |   | ✓ |   |   |   |   |   |  |

|                                        |   |   |  |  |  |  |   |  |
|----------------------------------------|---|---|--|--|--|--|---|--|
| <a href="#">Wu et al. (2016)</a>       | ✓ |   |  |  |  |  |   |  |
| <a href="#">Xia et al. (2015)</a>      |   | ✓ |  |  |  |  |   |  |
| <a href="#">Yan et al. (2012)</a>      |   |   |  |  |  |  | ✓ |  |
| <a href="#">Yan et al. (2011)</a>      |   |   |  |  |  |  | ✓ |  |
| <a href="#">Yan et al. (2014)</a>      |   |   |  |  |  |  | ✓ |  |
| <a href="#">Yan and Chen (2011b)</a>   |   |   |  |  |  |  | ✓ |  |
| <a href="#">Yan and Chen (2011a)</a>   |   |   |  |  |  |  | ✓ |  |
| <a href="#">Ye et al. (2015)</a>       |   | ✓ |  |  |  |  |   |  |
| <a href="#">Yu et al. (2019)</a>       |   | ✓ |  |  |  |  |   |  |
| <a href="#">Zhang and Zhang (2020)</a> | ✓ |   |  |  |  |  |   |  |
| <a href="#">Zhang et al. (2019)</a>    |   | ✓ |  |  |  |  |   |  |
| <a href="#">Zhang et al. (2020)</a>    |   | ✓ |  |  |  |  |   |  |
| <a href="#">Zhao et al. (2018)</a>     |   | ✓ |  |  |  |  |   |  |

**Table S3.** Summary of Papers based on the Characteristics of SMP

[illegible]



|                                             |   |   |   |   |   |   |   |   |   |  |  |   |  |  |   |   |   |
|---------------------------------------------|---|---|---|---|---|---|---|---|---|--|--|---|--|--|---|---|---|
| <a href="#">Bit-Monnot et al. (2013)</a>    |   |   |   |   |   |   |   |   |   |  |  |   |  |  |   |   | ✓ |
| <a href="#">Bruck et al. (2017)</a>         |   |   |   |   |   |   |   |   |   |  |  |   |  |  | ✓ |   |   |
| <a href="#">Cangialosi et al. (2016)</a>    |   | ✓ |   |   |   |   |   |   | ✓ |  |  |   |  |  |   |   | ✓ |
| <a href="#">Cao et al. (2021)</a>           |   |   |   |   |   | ✓ |   |   |   |  |  |   |  |  |   |   | ✓ |
| <a href="#">Cheikh-Graiet et al. (2020)</a> |   | ✓ | ✓ |   | ✓ | ✓ | ✓ |   |   |  |  |   |  |  |   |   | ✓ |
| <a href="#">Cheikh &amp; Hammadi (2016)</a> | ✓ | ✓ | ✓ |   | ✓ |   |   |   |   |  |  |   |  |  |   |   | ✓ |
| <a href="#">Chen et al. (2019a)</a>         |   | ✓ | ✓ | ✓ | ✓ |   | ✓ | ✓ |   |  |  |   |  |  |   |   | ✓ |
| <a href="#">Chen et al. (2019b)</a>         |   |   |   |   | ✓ | ✓ |   |   |   |  |  |   |  |  | ✓ |   |   |
| <a href="#">Chen et al. (2019c)</a>         | ✓ | ✓ |   | ✓ |   |   |   |   |   |  |  |   |  |  |   |   | ✓ |
| <a href="#">Chou et al. (2016)</a>          |   | ✓ |   |   |   |   |   |   |   |  |  |   |  |  | ✓ |   |   |
| <a href="#">Di Febbraro et al. (2013)</a>   |   |   |   |   |   |   |   |   | ✓ |  |  |   |  |  |   |   | ✓ |
| <a href="#">Du et al. (2016)</a>            |   | ✓ |   |   |   |   |   |   |   |  |  |   |  |  |   | ✓ |   |
| <a href="#">Duan et al. (2018)</a>          |   |   |   |   |   |   |   |   |   |  |  |   |  |  |   |   | ✓ |
| <a href="#">Enzi et al. (2020)</a>          |   |   |   |   |   |   |   |   |   |  |  |   |  |  |   |   | ✓ |
| <a href="#">Guan et al. (2020)</a>          |   | ✓ |   |   |   | ✓ |   |   |   |  |  |   |  |  |   |   | ✓ |
| <a href="#">Guo et al. (2013b)</a>          |   | ✓ |   |   | ✓ |   |   |   |   |  |  |   |  |  | ✓ |   |   |
| <a href="#">Herbawi and Weber (2011c)</a>   |   | ✓ | ✓ |   |   |   |   |   |   |  |  |   |  |  |   |   | ✓ |
| <a href="#">Herbawi and Weber (2011b)</a>   |   | ✓ | ✓ |   |   |   |   |   |   |  |  |   |  |  |   |   | ✓ |
| <a href="#">Herbawi and Weber (2011a)</a>   |   | ✓ | ✓ |   |   |   |   |   |   |  |  |   |  |  |   |   | ✓ |
| <a href="#">Herbawi and Weber (2012d)</a>   |   | ✓ |   |   |   | ✓ |   |   |   |  |  | ✓ |  |  |   |   | ✓ |



[illegible]



|                                        |   |   |  |  |   |   |   |   |  |  |  |  |   |  |  |   |  |   |
|----------------------------------------|---|---|--|--|---|---|---|---|--|--|--|--|---|--|--|---|--|---|
| <a href="#">Xia et al. (2015)</a>      |   |   |  |  |   |   |   |   |  |  |  |  |   |  |  | ✓ |  |   |
| <a href="#">Yan et al. (2011)</a>      |   |   |  |  |   | ✓ |   |   |  |  |  |  |   |  |  | ✓ |  |   |
| <a href="#">Yan et al. (2012)</a>      |   |   |  |  |   | ✓ |   |   |  |  |  |  |   |  |  | ✓ |  |   |
| <a href="#">Yan et al. (2014)</a>      |   |   |  |  |   | ✓ |   | ✓ |  |  |  |  |   |  |  | ✓ |  |   |
| <a href="#">Yan and Chen (2011b)</a>   |   |   |  |  |   | ✓ |   |   |  |  |  |  |   |  |  | ✓ |  |   |
| <a href="#">Yan and Chen (2011a)</a>   |   |   |  |  |   | ✓ |   |   |  |  |  |  |   |  |  | ✓ |  |   |
| <a href="#">Ye et al. (2015)</a>       |   | ✓ |  |  |   |   |   |   |  |  |  |  |   |  |  | ✓ |  |   |
| <a href="#">Yu et al. (2019)</a>       |   | ✓ |  |  |   |   |   |   |  |  |  |  |   |  |  | ✓ |  |   |
| <a href="#">Yu et al. (2020)</a>       | ✓ | ✓ |  |  | ✓ |   |   |   |  |  |  |  |   |  |  | ✓ |  |   |
| <a href="#">Zhang and Zhang (2020)</a> |   | ✓ |  |  |   |   |   |   |  |  |  |  |   |  |  | ✓ |  |   |
| <a href="#">Zhang et al. (2019)</a>    | ✓ |   |  |  |   | ✓ |   |   |  |  |  |  |   |  |  |   |  | ✓ |
| <a href="#">Zhang et al. (2020)</a>    |   | ✓ |  |  |   |   |   |   |  |  |  |  |   |  |  | ✓ |  |   |
| <a href="#">Zhao et al. (2018)</a>     |   | ✓ |  |  |   | ✓ | ✓ |   |  |  |  |  | ✓ |  |  | ✓ |  |   |

**Table S4.** Summary of Papers based on the Optimisation Objectives of SMP

| Paper | Objectives |          |
|-------|------------|----------|
|       | Minimise   | Maximise |





|                                           |   |   |   |   |   |  |  |  |  |   |  |  |   |   |   |   |  |  |
|-------------------------------------------|---|---|---|---|---|--|--|--|--|---|--|--|---|---|---|---|--|--|
| <a href="#">Herbawi and Weber (2011b)</a> | ✓ | ✓ | ✓ |   |   |  |  |  |  |   |  |  |   |   |   |   |  |  |
| <a href="#">Herbawi and Weber (2011a)</a> | ✓ | ✓ | ✓ |   |   |  |  |  |  |   |  |  |   |   |   |   |  |  |
| <a href="#">Herbawi and Weber (2012d)</a> | ✓ |   |   | ✓ |   |  |  |  |  |   |  |  | ✓ |   |   |   |  |  |
| <a href="#">Herbawi and Weber (2012b)</a> | ✓ | ✓ | ✓ |   |   |  |  |  |  |   |  |  |   |   |   |   |  |  |
| <a href="#">Herbawi and Weber (2012a)</a> | ✓ |   |   | ✓ |   |  |  |  |  |   |  |  | ✓ |   |   |   |  |  |
| <a href="#">Herbawi and Weber (2012c)</a> | ✓ |   |   | ✓ |   |  |  |  |  |   |  |  | ✓ |   |   |   |  |  |
| <a href="#">Hosni et al. (2014)</a>       |   |   |   |   |   |  |  |  |  |   |  |  |   | ✓ |   |   |  |  |
| <a href="#">Hou et al. (2018)</a>         |   |   |   |   |   |  |  |  |  |   |  |  |   |   |   | ✓ |  |  |
| <a href="#">Hsieh and Zhan (2018)</a>     |   |   | ✓ |   |   |  |  |  |  |   |  |  |   |   |   |   |  |  |
| <a href="#">Hsieh et al. (2019)</a>       |   |   | ✓ |   |   |  |  |  |  |   |  |  |   |   |   |   |  |  |
| <a href="#">Huang et al. (2014a)</a>      |   |   | ✓ | ✓ | ✓ |  |  |  |  |   |  |  | ✓ |   | ✓ |   |  |  |
| <a href="#">Huang et al. (2014b)</a>      |   |   | ✓ |   |   |  |  |  |  | ✓ |  |  |   |   |   |   |  |  |
| <a href="#">Huang et al. (2016)</a>       |   |   | ✓ |   |   |  |  |  |  |   |  |  |   |   |   |   |  |  |
| <a href="#">Huang et al. (2017)</a>       |   |   | ✓ | ✓ |   |  |  |  |  |   |  |  | ✓ |   |   | ✓ |  |  |



|                                                 |   |  |   |   |  |  |  |  |   |  |  |  |  |   |   |  |   |  |  |
|-------------------------------------------------|---|--|---|---|--|--|--|--|---|--|--|--|--|---|---|--|---|--|--|
| <a href="#">Huang et al. (2018a)</a>            |   |  |   | ✓ |  |  |  |  |   |  |  |  |  | ✓ |   |  | ✓ |  |  |
| <a href="#">Huang et al. (2018b)</a>            |   |  | ✓ |   |  |  |  |  |   |  |  |  |  |   |   |  |   |  |  |
| <a href="#">Jung et al. (2016)</a>              |   |  | ✓ |   |  |  |  |  |   |  |  |  |  |   | ✓ |  |   |  |  |
| <a href="#">Kaan and Olinick (2013)</a>         |   |  | ✓ |   |  |  |  |  |   |  |  |  |  |   |   |  |   |  |  |
| <a href="#">Lee and Savelsbergh (2015)</a>      |   |  | . |   |  |  |  |  |   |  |  |  |  | ✓ |   |  |   |  |  |
| <a href="#">Li and Chung (2020)</a>             |   |  | ✓ |   |  |  |  |  |   |  |  |  |  |   |   |  |   |  |  |
| <a href="#">Li et al. (2018)</a>                |   |  | ✓ |   |  |  |  |  |   |  |  |  |  |   |   |  |   |  |  |
| <a href="#">Lin et al. (2012)</a>               | ✓ |  | ✓ |   |  |  |  |  |   |  |  |  |  |   |   |  |   |  |  |
| <a href="#">Liu and Liu (2020)</a>              |   |  |   | ✓ |  |  |  |  |   |  |  |  |  | ✓ |   |  |   |  |  |
| <a href="#">Liu et al. (2019)</a>               |   |  |   | ✓ |  |  |  |  |   |  |  |  |  |   |   |  |   |  |  |
| <a href="#">Lloret-Batlle et al. (2017)</a>     |   |  | ✓ |   |  |  |  |  |   |  |  |  |  |   |   |  |   |  |  |
| <a href="#">Long et al. (2018)</a>              | ✓ |  | ✓ |   |  |  |  |  | ✓ |  |  |  |  | ✓ |   |  |   |  |  |
| <a href="#">Lotfi et al. (2019)</a>             |   |  |   |   |  |  |  |  |   |  |  |  |  |   | ✓ |  |   |  |  |
| <a href="#">Lu et al. (2020)</a>                |   |  | ✓ |   |  |  |  |  |   |  |  |  |  |   |   |  |   |  |  |
| <a href="#">Ma (2017)</a>                       | ✓ |  |   |   |  |  |  |  |   |  |  |  |  |   |   |  |   |  |  |
| <a href="#">Ma et al. (2018a)</a>               |   |  | ✓ |   |  |  |  |  |   |  |  |  |  |   |   |  |   |  |  |
| <a href="#">Ma et al. (2018b)</a>               | ✓ |  |   | ✓ |  |  |  |  |   |  |  |  |  |   |   |  |   |  |  |
| <a href="#">Masoud and Jayakrishnan (2017a)</a> |   |  |   |   |  |  |  |  |   |  |  |  |  | ✓ |   |  |   |  |  |

|                                                 |   |   |   |   |   |   |  |   |  |  |  |  |   |  |  |  |  |  |
|-------------------------------------------------|---|---|---|---|---|---|--|---|--|--|--|--|---|--|--|--|--|--|
| <a href="#">Masoud and Jayakrishnan (2017b)</a> |   |   | ✓ |   |   |   |  |   |  |  |  |  |   |  |  |  |  |  |
| <a href="#">Masoud et al. (2017a)</a>           |   |   | ✓ |   |   |   |  |   |  |  |  |  |   |  |  |  |  |  |
| <a href="#">Masoud et al. (2017b)</a>           |   |   |   |   |   |   |  |   |  |  |  |  | ✓ |  |  |  |  |  |
| <a href="#">Massobrio et al. (2016)</a>         |   |   | ✓ |   |   | ✓ |  |   |  |  |  |  |   |  |  |  |  |  |
| <a href="#">Najmi et al. (2017)</a>             |   |   |   | ✓ |   |   |  |   |  |  |  |  | ✓ |  |  |  |  |  |
| <a href="#">Nam et al. (2018)</a>               | ✓ |   | ✓ |   | ✓ |   |  | ✓ |  |  |  |  | ✓ |  |  |  |  |  |
| <a href="#">Naoum-Sawaya et al. (2015)</a>      | ✓ |   |   |   |   |   |  |   |  |  |  |  |   |  |  |  |  |  |
| <a href="#">Pelzer et al. (2015)</a>            |   |   |   |   |   |   |  | ✓ |  |  |  |  | ✓ |  |  |  |  |  |
| <a href="#">Qian et al. (2017)</a>              |   |   |   | ✓ |   |   |  |   |  |  |  |  |   |  |  |  |  |  |
| <a href="#">Regue et al. (2016)</a>             |   | ✓ | ✓ |   |   |   |  |   |  |  |  |  | ✓ |  |  |  |  |  |
| <a href="#">Ren et al. (2020)</a>               |   |   | ✓ |   |   |   |  |   |  |  |  |  |   |  |  |  |  |  |
| <a href="#">Santos and Xavier (2013)</a>        |   |   | ✓ |   |   |   |  |   |  |  |  |  | ✓ |  |  |  |  |  |
| <a href="#">Santos and Xavier (2015)</a>        |   |   | ✓ |   |   |   |  |   |  |  |  |  | ✓ |  |  |  |  |  |
| <a href="#">Simonetto et al. (2019)</a>         |   |   | ✓ |   |   |   |  |   |  |  |  |  |   |  |  |  |  |  |
| <a href="#">Stiglic et al. (2015)</a>           |   |   |   | ✓ |   |   |  |   |  |  |  |  | ✓ |  |  |  |  |  |
| <a href="#">Stiglic et al. (2016)</a>           |   |   |   | ✓ |   |   |  |   |  |  |  |  | ✓ |  |  |  |  |  |
| <a href="#">Stiglic et al. (2018)</a>           |   |   |   | ✓ |   |   |  |   |  |  |  |  | ✓ |  |  |  |  |  |
| <a href="#">Smet (2019)</a>                     |   |   | ✓ |   |   |   |  |   |  |  |  |  | ✓ |  |  |  |  |  |

[illegible]

|                                        |  |  |   |   |  |  |  |  |   |  |  |  |   |  |  |  |  |   |  |
|----------------------------------------|--|--|---|---|--|--|--|--|---|--|--|--|---|--|--|--|--|---|--|
| <a href="#">Zhang and Zhang (2020)</a> |  |  | ✓ |   |  |  |  |  |   |  |  |  |   |  |  |  |  | ✓ |  |
| <a href="#">Zhang et al. (2019)</a>    |  |  |   | ✓ |  |  |  |  |   |  |  |  |   |  |  |  |  |   |  |
| <a href="#">Zhang et al. (2020)</a>    |  |  |   | ✓ |  |  |  |  |   |  |  |  | ✓ |  |  |  |  |   |  |
| <a href="#">Zhao et al. (2018)</a>     |  |  | ✓ |   |  |  |  |  | ✓ |  |  |  |   |  |  |  |  |   |  |

**Table S5:** List of Algorithms employed in selected Papers for SMP

| Paper                                           | Algorithms / Approaches                                                                                           |
|-------------------------------------------------|-------------------------------------------------------------------------------------------------------------------|
| <a href="#">Agatz et al. (2011)</a>             | Greedy matching algorithm                                                                                         |
| <a href="#">Aissat and Oulamara (2014a)</a>     | Bidirectional search algorithm + shortest path one-to-all (heuristic)                                             |
| <a href="#">Aissat and Oulamara (2014b)</a>     | Enumerative method (exact) + heuristic with closest nodes metric + heuristic with global path's total cost metric |
| <a href="#">Aissat and Oulamara (2015a)</a>     | Bidirectional search algorithm + shortest path one-to-all (heuristic)                                             |
| <a href="#">Aissat and Oulamara (2015b)</a>     | Bidirectional search algorithm + shortest path one-to-all (heuristic)                                             |
| <a href="#">Aissat and Oulamara (2015c)</a>     | Improved Dijkstra algorithm with the concept of adding offer and demand                                           |
| <a href="#">Alonso-Mora et al. (2017)</a>       | Greedy assignment + constrained optimization                                                                      |
| <a href="#">Armant and Brown (2014)</a>         | CPLEX                                                                                                             |
| <a href="#">Armant and Brown (2020)</a>         | CPLEX                                                                                                             |
| <a href="#">Auaad and Van Hentenryck (2021)</a> | Route enumeration algorithm + fleet sizing algorithm                                                              |
| <a href="#">Aydin et al. (2020)</a>             | Heuristic + Needleman-Wunsch algorithm                                                                            |
| <a href="#">Ben Cheikh et al. (2017)</a>        | Metaheuristic Approach Based on Controlled Genetic Operators (MACGeO)                                             |
| <a href="#">Bian and Liu (2017)</a>             | Simulated annealing with four neighbourhood structure                                                             |

|                                             |                                                                                                                                                                                                                                                           |
|---------------------------------------------|-----------------------------------------------------------------------------------------------------------------------------------------------------------------------------------------------------------------------------------------------------------|
| <a href="#">Bian and Liu (2019a)</a>        | Solution Pooling Approach (SPA)                                                                                                                                                                                                                           |
| <a href="#">Bian and Liu (2019b)</a>        | Solution Pooling Approach (SPA)                                                                                                                                                                                                                           |
| <a href="#">Bit-Monnot et al. (2013)</a>    | Exact and heuristic dominance rule                                                                                                                                                                                                                        |
| <a href="#">Bruck et al. (2017)</a>         | Greedy constructive heuristic + refined based local search (two-stage algorithm)                                                                                                                                                                          |
| <a href="#">Cangialosi et al. (2016)</a>    | MILP solver                                                                                                                                                                                                                                               |
| <a href="#">Cao et al. (2021)</a>           | Genetic algorithm                                                                                                                                                                                                                                         |
| <a href="#">Cheikh &amp; Hammadi (2016)</a> | Autonomous and Intelligent Agents                                                                                                                                                                                                                         |
| <a href="#">Cheikh-Graiet et al. (2020)</a> | Multi-criterion tabu search algorithm                                                                                                                                                                                                                     |
| <a href="#">Chen et al. (2019a)</a>         | Greedy heuristic                                                                                                                                                                                                                                          |
| <a href="#">Chen et al. (2019b)</a>         | Rollover approach + local search                                                                                                                                                                                                                          |
| <a href="#">Chen et al. (2019c)</a>         | Cluster-based solution method                                                                                                                                                                                                                             |
| <a href="#">Chou et al. (2016)</a>          | Stochastic set based particle swarm optimization                                                                                                                                                                                                          |
| <a href="#">Di Febbraro et al. (2013)</a>   | Discrete event systems based simulation                                                                                                                                                                                                                   |
| <a href="#">Du et al. (2016)</a>            | LINGO                                                                                                                                                                                                                                                     |
| <a href="#">Duan et al. (2018)</a>          | Partition merging based on greedy algorithms                                                                                                                                                                                                              |
| <a href="#">Enzi et al. (2020)</a>          | Column generation based algorithm                                                                                                                                                                                                                         |
| <a href="#">Guan et al. (2020)</a>          | Hybrid VNS-NSGA-II algorithm                                                                                                                                                                                                                              |
| <a href="#">Guo et al. (2013)</a>           | Hybrid ant colony algorithm                                                                                                                                                                                                                               |
| <a href="#">Herbawi and Weber (2011a)</a>   | Non-Dominated Sorting Genetic Algorithm II (NSGA-II) + multi-objective ant colony optimization                                                                                                                                                            |
| <a href="#">Herbawi and Weber (2011b)</a>   | Non-Dominated Sorting Genetic Algorithm II (NSGA-II) + Improved Strength Pareto Evolutionary Algorithm (SPEA2) + Region-based Selection in Evolutionary Multiobjective Optimization (PESA-II) + Indicator-Based Selection in Multiobjective Search (IBEA) |
| <a href="#">Herbawi and Weber (2011c)</a>   | Non-Dominated Sorting Genetic Algorithm II (NSGA-II)                                                                                                                                                                                                      |
| <a href="#">Herbawi and Weber (2012a)</a>   | Genetic and insertion heuristic algorithm                                                                                                                                                                                                                 |
| <a href="#">Herbawi and Weber (2012b)</a>   | Genetic local search algorithm                                                                                                                                                                                                                            |

|                                             |                                                                                                                                            |
|---------------------------------------------|--------------------------------------------------------------------------------------------------------------------------------------------|
| <a href="#">Herbawi and Weber (2012c)</a>   | Genetic algorithm                                                                                                                          |
| <a href="#">Herbawi and Weber (2012d)</a>   | Genetic algorithm                                                                                                                          |
| <a href="#">Hosni et al. (2014)</a>         | Simple heuristic, incremental cost heuristic (ICH) with Lagrangian decomposition approach                                                  |
| <a href="#">Hou et al. (2018)</a>           | Large neighbourhood search algorithm                                                                                                       |
| <a href="#">Hsieh and Zhan (2018)</a>       | Differential evolution                                                                                                                     |
| <a href="#">Hsieh et al. (2019)</a>         | Discrete cooperative coevolving particle swarm optimization (DCCPSO) algorithm                                                             |
| <a href="#">Huang et al. (2014a)</a>        | Genetic algorithm                                                                                                                          |
| <a href="#">Huang et al. (2014b)</a>        | Fuzzy controlled genetic algorithm                                                                                                         |
| <a href="#">Huang et al. (2016)</a>         | Tabu search                                                                                                                                |
| <a href="#">Huang et al. (2017)</a>         | Heuristic Multi-Objective Optimization Algorithm (HMOCSPI) based on Non-Dominated Sorting Genetic Algorithm                                |
| <a href="#">Huang et al. (2018a)</a>        | Ant Path-oriented Carpooling Allocation (APCA) approach                                                                                    |
| <a href="#">Huang et al. (2018b)</a>        | Dijkstra Algorithm and A* Algorithm + concept of Drive-Time Areas (DTAs)                                                                   |
| <a href="#">Jung et al. (2016)</a>          | Hybrid simulated annealing                                                                                                                 |
| <a href="#">Kaan and Olinick (2013)</a>     | Restricted allowance heuristic + relaxed restricted allowance heuristic + greedy cover heuristic                                           |
| <a href="#">Lee and Savelsbergh (2015)</a>  | Path construction + neighbourhood search                                                                                                   |
| <a href="#">Li and Chung (2020)</a>         | Hybrid heuristic algorithm based on an insertion algorithm and tabu search + clustering algorithm (greedy heuristic and k-means algorithm) |
| <a href="#">Li et al. (2018)</a>            | Tabu based metaheuristic algorithm                                                                                                         |
| <a href="#">Lin et al. (2012)</a>           | Simulated annealing algorithm                                                                                                              |
| <a href="#">Liu and Liu (2020)</a>          | Dynamic grid-based heuristic algorithm                                                                                                     |
| <a href="#">Liu et al. (2019)</a>           | Exact algorithm and approximate algorithm                                                                                                  |
| <a href="#">Lloret-Batlle et al. (2017)</a> | VCG Mechanism + min-cost flow + network simplex                                                                                            |
| <a href="#">Long et al. (2018)</a>          | Monte carlo simulation                                                                                                                     |
| <a href="#">Lotfi et al. (2019)</a>         | Decomposition based modified column generation algorithm                                                                                   |
| <a href="#">Lu et al. (2020)</a>            | Lagrangian relaxation solution approach + two stage heuristic method                                                                       |

|                                                 |                                                                                   |
|-------------------------------------------------|-----------------------------------------------------------------------------------|
| <a href="#">Ma (2017)</a>                       | Shareability concept                                                              |
| <a href="#">Ma et al. (2018a)</a>               | Recursive algorithm + delete operator                                             |
| <a href="#">Ma et al. (2018b)</a>               | improved genetic algorithm + banker principle + crowding density                  |
| <a href="#">Masoud and Jayakrishnan (2017a)</a> | Decomposition algorithm                                                           |
| <a href="#">Masoud and Jayakrishnan (2017b)</a> | Dynamic programming                                                               |
| <a href="#">Masoud et al. (2017a)</a>           | Dynamic programming                                                               |
| <a href="#">Masoud et al. (2017b)</a>           | Dynamic programming                                                               |
| <a href="#">Massobrio et al. (2016)</a>         | Non-Dominated Sorting Genetic Algorithm II (NSGA-II)                              |
| <a href="#">Najmi et al. (2017)</a>             | Clustering heuristic approach                                                     |
| <a href="#">Nam et al. (2018)</a>               | Dynamic programming                                                               |
| <a href="#">Naoum-Sawaya et al. (2015)</a>      | Savings heuristic                                                                 |
| <a href="#">Pelzer et al. (2015)</a>            | Partition based algorithm                                                         |
| <a href="#">Qian et al. (2017)</a>              | Exact and heuristic for induced group ride graph                                  |
| <a href="#">Regue et al. (2016)</a>             | Aggregation–disaggregation algorithm + decomposition approach                     |
| <a href="#">Ren et al. (2020)</a>               | Genetic algorithm                                                                 |
| <a href="#">Santos and Xavier (2013)</a>        | Greedy Randomized Adaptive Search Procedure (GRASP)                               |
| <a href="#">Santos and Xavier (2015)</a>        | Greedy Randomized Adaptive Search Procedure (GRASP)                               |
| <a href="#">Simonetto et al. (2019)</a>         | Insertion heuristic + large neighbourhood search algorithm                        |
| <a href="#">Smet (2019)</a>                     | Late acceptance hill climbing                                                     |
| <a href="#">Stiglic et al. (2015)</a>           | Basic algorithm + refined algorithm / hierarchical optimization approach          |
| <a href="#">Stiglic et al. (2016)</a>           | Matching, schedule, detour flexibility + lexicographic optimization               |
| <a href="#">Stiglic et al. (2018)</a>           | Ride-matching algorithm (match identification phase + optimization phase)         |
| <a href="#">Su et al. (2019)</a>                | Artificial bee colony algorithm combining variable neighbour search and tabu list |
| <a href="#">Sun and Zhang (2018)</a>            | Insertion heuristic                                                               |

|                                                  |                                                                                                                                                |
|--------------------------------------------------|------------------------------------------------------------------------------------------------------------------------------------------------|
| <a href="#">Tafreshian and Masoud (2020a)</a>    | Graph partitioning algorithm based on the bipartite graph                                                                                      |
| <a href="#">Tafreshian and Masoud (2020b)</a>    | Decomposition algorithm based on Lagrangian relaxation                                                                                         |
| <a href="#">Tamannaei &amp; Irandoost (2019)</a> | Branch & bound + heuristic beam search algorithm                                                                                               |
| <a href="#">Wang et al. (2018)</a>               | Greedy matching method                                                                                                                         |
| <a href="#">Wang et al. (2016)</a>               | Tabu search + greedy insertion + adjust pickup time algorithm                                                                                  |
| <a href="#">Wu et al. (2016)</a>                 | Local search (hill climbing, simulated annealing, swap and move neighbourhood, random neighbourhood) + exhaustive search (dynamic programming) |
| <a href="#">Xia et al. (2015)</a>                | Simulated annealing + tabu search                                                                                                              |
| <a href="#">Yan and Chen (2011a)</a>             | Solution algorithm based on Lagrangian relaxation, a subgradient method, and a heuristic for the upper bound solution                          |
| <a href="#">Yan and Chen (2011b)</a>             | Solution algorithm based on Lagrangian relaxation, a subgradient method, and a heuristic for the upper bound solution                          |
| <a href="#">Yan et al. (2011)</a>                | Solution algorithm based on Lagrangian relaxation, a subgradient method, and a heuristic for the upper bound solution                          |
| <a href="#">Yan et al. (2012)</a>                | Solution algorithm based on Lagrangian relaxation, a subgradient method, and a heuristic for the upper bound solution                          |
| <a href="#">Yan et al. (2014)</a>                | Solution algorithm based on Lagrangian relaxation, a subgradient method, and a heuristic for the upper bound solution                          |
| <a href="#">Ye et al. (2015)</a>                 | Non-Dominated Sorting Genetic Algorithm (NSGA)                                                                                                 |
| <a href="#">Yu et al. (2019)</a>                 | Decomposition method + exact algorithm                                                                                                         |
| <a href="#">Yu et al. (2020)</a>                 | Angle based clustering algorithm                                                                                                               |
| <a href="#">Zhang and Zhang (2020)</a>           | Set-based differential evolution algorithm                                                                                                     |
| <a href="#">Zhang et al. (2019)</a>              | Parallel scheme with simulated annealing                                                                                                       |
| <a href="#">Zhang et al. (2020)</a>              | Improved genetic algorithm with station coding and decoding design.                                                                            |
| <a href="#">Zhao et al. (2018)</a>               | Customized solution approach based on Lagrangian relaxation                                                                                    |



**Table S6:** Summary of Papers based on the Solution Approaches of SMP

| Paper                                          | Exact | Heuristic / Metaheuristic | Others Approaches |
|------------------------------------------------|-------|---------------------------|-------------------|
| <a href="#">Agatz et al. (2011)</a>            | ✓     |                           |                   |
| <a href="#">Aissat and Oulamara (2014a)</a>    | ✓     | ✓                         |                   |
| <a href="#">Aissat and Oulamara (2014b)</a>    | ✓     | ✓                         |                   |
| <a href="#">Aissat and Oulamara (2015a)</a>    | ✓     | ✓                         |                   |
| <a href="#">Aissat and Oulamara (2015b)</a>    | ✓     | ✓                         |                   |
| <a href="#">Aissat and Oulamara (2015c)</a>    | ✓     |                           |                   |
| <a href="#">Alonso-Mora et al. (2017)</a>      | ✓     | ✓                         |                   |
| <a href="#">Armant and Brown (2014)</a>        | ✓     |                           |                   |
| <a href="#">Armant and Brown (2020)</a>        | ✓     |                           |                   |
| <a href="#">Auad and Van Hentenryck (2021)</a> |       |                           | ✓                 |
| <a href="#">Aydin et al. (2020)</a>            |       | ✓                         |                   |
| <a href="#">Ben Cheikh et al. (2017)</a>       |       | ✓                         |                   |
| <a href="#">Bian and Liu (2017)</a>            |       | ✓                         |                   |
| <a href="#">Bian and Liu (2019a)</a>           |       | ✓                         |                   |
| <a href="#">Bian and Liu (2019b)</a>           |       | ✓                         |                   |
| <a href="#">Bit-Monnot et al. (2013)</a>       | ✓     | ✓                         |                   |
| <a href="#">Bruck et al. (2017)</a>            | ✓     | ✓                         |                   |
| <a href="#">Cangialosi et al. (2016)</a>       | ✓     |                           |                   |
| <a href="#">Cao et al. (2021)</a>              |       | ✓                         |                   |
| <a href="#">Cheikh &amp; Hammadi (2016)</a>    |       | ✓                         |                   |
| <a href="#">Cheikh-Graiet et al. (2020)</a>    |       | ✓                         |                   |
| <a href="#">Chen et al. (2019a)</a>            |       | ✓                         |                   |
| <a href="#">Chen et al. (2019b)</a>            |       | ✓                         |                   |
| <a href="#">Chen et al. (2019c)</a>            |       | ✓                         |                   |
| <a href="#">Chou et al. (2016)</a>             |       | ✓                         |                   |
| <a href="#">Di Febbraro et al. (2013)</a>      |       |                           | ✓                 |
| <a href="#">Du et al. (2016)</a>               | ✓     |                           |                   |
| <a href="#">Duan et al. (2018)</a>             |       | ✓                         |                   |
| <a href="#">Enzi et al. (2020)</a>             | ✓     |                           |                   |
| <a href="#">Guan et al. (2020)</a>             |       | ✓                         |                   |
| <a href="#">Guo et al. (2013)</a>              |       | ✓                         |                   |

|                                                 |   |   |   |
|-------------------------------------------------|---|---|---|
| <a href="#">Herbawi and Weber (2011a)</a>       |   | ✓ |   |
| <a href="#">Herbawi and Weber (2011b)</a>       |   | ✓ |   |
| <a href="#">Herbawi and Weber (2011c)</a>       |   | ✓ |   |
| <a href="#">Herbawi and Weber (2012a)</a>       |   | ✓ |   |
| <a href="#">Herbawi and Weber (2012b)</a>       |   | ✓ |   |
| <a href="#">Herbawi and Weber (2012c)</a>       |   | ✓ |   |
| <a href="#">Herbawi and Weber (2012d)</a>       |   | ✓ |   |
| <a href="#">Hosni et al. (2014)</a>             | ✓ | ✓ |   |
| <a href="#">Hou et al. (2018)</a>               |   | ✓ |   |
| <a href="#">Hsieh and Zhan (2018)</a>           |   | ✓ |   |
| <a href="#">Hsieh et al. (2019)</a>             |   | ✓ |   |
| <a href="#">Huang et al. (2014a)</a>            |   | ✓ |   |
| <a href="#">Huang et al. (2014b)</a>            |   | ✓ |   |
| <a href="#">Huang et al. (2016)</a>             |   | ✓ |   |
| <a href="#">Huang et al. (2017)</a>             |   | ✓ |   |
| <a href="#">Huang et al. (2018a)</a>            |   | ✓ |   |
| <a href="#">Huang et al. (2018b)</a>            | ✓ |   |   |
| <a href="#">Jung et al. (2016)</a>              |   | ✓ |   |
| <a href="#">Kaan and Olinick (2013)</a>         |   | ✓ |   |
| <a href="#">Lee and Savelsbergh (2015)</a>      |   | ✓ |   |
| <a href="#">Li and Chung (2020)</a>             | ✓ | ✓ |   |
| <a href="#">Li et al. (2018)</a>                |   | ✓ |   |
| <a href="#">Lin et al. (2012)</a>               |   | ✓ |   |
| <a href="#">Liu and Liu (2020)</a>              |   | ✓ |   |
| <a href="#">Liu et al. (2019)</a>               | ✓ | ✓ |   |
| <a href="#">Lloret-Batlle et al. (2017)</a>     |   |   | ✓ |
| <a href="#">Long et al. (2018)</a>              |   |   | ✓ |
| <a href="#">Lotfi et al. (2019)</a>             | ✓ |   |   |
| <a href="#">Lu et al. (2020)</a>                |   | ✓ |   |
| <a href="#">Ma (2017)</a>                       |   |   | ✓ |
| <a href="#">Ma et al. (2018a)</a>               |   | ✓ |   |
| <a href="#">Ma et al. (2018b)</a>               |   | ✓ |   |
| <a href="#">Masoud and Jayakrishnan (2017a)</a> | ✓ |   |   |

|                                                  |   |   |  |
|--------------------------------------------------|---|---|--|
| <a href="#">Masoud and Jayakrishnan (2017b)</a>  | ✓ |   |  |
| <a href="#">Masoud et al. (2017a)</a>            | ✓ |   |  |
| <a href="#">Masoud et al. (2017b)</a>            | ✓ |   |  |
| <a href="#">Massobrio et al. (2016)</a>          |   | ✓ |  |
| <a href="#">Najmi et al. (2017)</a>              |   | ✓ |  |
| <a href="#">Nam et al. (2018)</a>                | ✓ |   |  |
| <a href="#">Naoum-Sawaya et al. (2015)</a>       |   | ✓ |  |
| <a href="#">Pelzer et al. (2015)</a>             | ✓ |   |  |
| <a href="#">Qian et al. (2017)</a>               | ✓ | ✓ |  |
| <a href="#">Regue et al. (2016)</a>              | ✓ |   |  |
| <a href="#">Ren et al. (2020)</a>                |   | ✓ |  |
| <a href="#">Santos and Xavier (2013)</a>         |   | ✓ |  |
| <a href="#">Santos and Xavier (2015)</a>         |   | ✓ |  |
| <a href="#">Simonetto et al. (2019)</a>          |   | ✓ |  |
| <a href="#">Smet (2019)</a>                      |   | ✓ |  |
| <a href="#">Stiglic et al. (2015)</a>            | ✓ |   |  |
| <a href="#">Stiglic et al. (2016)</a>            | ✓ |   |  |
| <a href="#">Stiglic et al. (2018)</a>            | ✓ |   |  |
| <a href="#">Su et al. (2019)</a>                 |   | ✓ |  |
| <a href="#">Sun and Zhang (2018)</a>             |   | ✓ |  |
| <a href="#">Tafreshian and Masoud (2020a)</a>    |   | ✓ |  |
| <a href="#">Tafreshian and Masoud (2020b)</a>    | ✓ |   |  |
| <a href="#">Tamannaei &amp; Irandoost (2019)</a> | ✓ | ✓ |  |
| <a href="#">Wang et al. (2018)</a>               | ✓ |   |  |
| <a href="#">Wang et al. (2016)</a>               |   | ✓ |  |
| <a href="#">Wu et al. (2016)</a>                 |   | ✓ |  |
| <a href="#">Xia et al. (2015)</a>                |   | ✓ |  |
| <a href="#">Yan and Chen (2011a)</a>             |   | ✓ |  |
| <a href="#">Yan and Chen (2011b)</a>             |   | ✓ |  |
| <a href="#">Yan et al. (2011)</a>                |   | ✓ |  |
| <a href="#">Yan et al. (2012)</a>                |   | ✓ |  |
| <a href="#">Yan et al. (2014)</a>                |   | ✓ |  |
| <a href="#">Ye et al. (2015)</a>                 |   | ✓ |  |

|                                        |   |   |  |
|----------------------------------------|---|---|--|
| <a href="#">Yu et al. (2019)</a>       | ✓ |   |  |
| <a href="#">Yu et al. (2020)</a>       |   | ✓ |  |
| <a href="#">Zhang and Zhang (2020)</a> |   | ✓ |  |
| <a href="#">Zhang et al. (2019)</a>    |   | ✓ |  |
| <a href="#">Zhang et al. (2020)</a>    |   | ✓ |  |
| <a href="#">Zhao et al. (2018)</a>     |   | ✓ |  |

## References

- Agatz, N., Erera, A. L., Savelsbergh, M. W., & Wang, X. (2011). Dynamic ride-sharing: A simulation study in metro Atlanta. *Procedia-Social and Behavioral Sciences*, 17, 532–550.
- Aissat, K., & Oulamara, A. (2014a). A priori approach of real-time ridesharing problem with intermediate meeting locations. *Journal of Artificial Intelligence and Soft Computing Research*, 4(4), 287–299.
- Aissat, K., & Oulamara, A. (2014b). Dynamic ridesharing with intermediate locations. In *2014 IEEE Symposium on Computational Intelligence in Vehicles and Transportation Systems (CIVTS)* (pp. 36–42). IEEE.
- Aissat, K., & Oulamara, A. (2015b). Meeting locations in real-time ridesharing problem: a buckets approach. In: de Werra D., Parlier G., Vitoriano B. (eds) *Operations Research and Enterprise Systems*. ICORES 2015. Communications in Computer and Information Science, vol 577. Springer, Cham.
- Aissat, K., & Oulamara, A. (2015a). A posteriori approach of real-time ridesharing problem with intermediate locations. In *Proceedings of the International Conference on Operations Research and Enterprise Systems (ICORES)* (pp. 63–74).
- Aissat, K., & Oulamara, A. (2015c). The round-trip ridesharing problem with relay stations. In *Proceedings of the International Conference on Computational Logistics* (pp. 16–30). Springer, Cham.
- Alonso-Mora, J., Samaranayake, S., Wallar, A., Frazzoli, E., & Rus, D. (2017). On-demand high-capacity ride-sharing via dynamic trip-vehicle assignment. In *Proceedings of the National Academy of Sciences*, 114(3), 462–467.
- Armant, V., & Brown, K. N. (2014). Minimizing the driving distance in ride sharing systems. In *2014 IEEE 26th International Conference on Tools with Artificial Intelligence* (pp. 568–575).

- Armant, V., & Brown, K. N. (2020). Fast optimised ridesharing: objectives, reformulations and driver flexibility. *Expert Systems with Applications*, 141, 112914.
- Auad, R., & Van Hentenryck, P. (2021). Ridesharing and fleet sizing for on-demand multi-modal transit systems. *arXiv preprint arXiv:2101.10981*.
- Aydin, O. F., Gokasar, I., & Kalan, O. (2020). Matching algorithm for improving ridesharing by incorporating route splits and social factors. *PLoS ONE*, 15(3), e0229674.
- Ben Cheikh, S., Tahon, C., & Hammadi, S. (2017). An evolutionary approach to solve the dynamic multihop ridematching problem. *Simulation*, 93(1), 3–19.
- Bian, Z., & Liu, X. (2017). Planning the ridesharing route for the first-mile service linking to railway passenger transportation. In *2017 Joint Rail Conference. American Society of Mechanical Engineers Digital Collection*.
- Bian, Z., & Liu, X. (2019a). Mechanism design for first-mile ridesharing based on personalised requirements part I: theoretical analysis in generalised scenarios. *Transportation Research Part B: Methodological*, 120, 147–171.
- Bian, Z., & Liu, X. (2019b). Mechanism design for first-mile ridesharing based on personalised requirements part II: solution algorithm for large-scale problems. *Transportation Research Part B: Methodological*, 120, 172–192.
- Bit-Monnot, A., Artigues, C., Huguet, M. J., & Killijian, M. O. (2013). Carpooling: the 2 synchronization points shortest paths problem. In *13th Workshop on Algorithmic Approaches for Transportation Modelling, Optimization, and Systems. Schloss Dagstuhl-Leibniz-Zentrum fuer Informatik*.
- Bruck, B. P., Incerti, V., Iori, M., & Vignoli, M. (2017). Minimizing CO2 emissions in a practical daily carpooling problem. *Computers & Operations Research*, 81, 40–50.
- Cangialosi, E., Di Febbraro, A., & Sacco, N. (2016). Designing a multi-modal generalised ride sharing system. *IET Intelligent Transport Systems*, 10(4), 227–236.
- Cao, Y., Wang, S., & Li, J. (2021). The optimization model of ride-sharing route for ride hailing considering both system optimization and user fairness. *Sustainability*, 13(2), 902.
- Cheikh, S. B., & Hammadi, S. (2016). Multi-hop ridematching optimisation problem: intelligent chromosome agent-driven approach. *Expert Systems with Applications*, 62, 161–176.
- Cheikh-Graiet, S. B., Dotoli, M., & Hammadi, S. (2020). A tabu search based metaheuristic for dynamic carpooling optimisation. *Computers & Industrial Engineering*, 140, 106217.
- Chen, C. Y., Yan, S., & Wu, Y. S. (2019b). A model for taxi pooling with stochastic vehicle travel times. *International Journal of Sustainable Transportation*, 13(8), 582–596.
- Chen, S., Wang, H., & Meng, Q. (2019c). Solving the first-mile ridesharing problem using autonomous vehicles. *Computer-Aided Civil and Infrastructure Engineering*, 35(1), 45–60.

- Chen, W., Mes, M., Schutten, M., & Quint, J. (2019a). A ridesharing problem with meeting points and return restrictions. *Transportation Science*, 53(2), 401–426.
- Chou, S. K., Jiau, M. K., & Huang, S. C. (2016). Stochastic set-based particle swarm optimisation based on local exploration for solving the carpool service problem. *IEEE Transactions on Cybernetics*, 46(8), 1771–1783
- Di Febbraro, A., Gattorna, E., & Sacco, N. (2013). Optimisation of dynamic ridesharing systems. *Transportation Research Record*, 2359(1), 44–50.
- Du, X., Hu, D., Tian, S., & Xu, T. (2016). A route choice and rate optimization model of taxi-sharing based on different time. In *COTA International Conference of Transportation Professionals CICTP 2016* (pp. 714–723).
- Duan, Y., Wu, J., & Zheng, H. (2018). A greedy approach for carpool scheduling optimisation in smart cities. *International Journal of Parallel, Emergent and Distributed Systems*, 35(5), 535–549.
- Enzi, M., Parragh, S. N., Pisinger, D., & Prandtstetter, M. (2021). Modeling and solving the multi-modal car-and ride-sharing problem. *European Journal of Operational Research*, 293(1), 290–303.
- Guan, L., Pei, J., Liu, X., Zhou, Z., & Pardalos, P. M. (2020). Ridesharing in urban areas: multi-objective optimisation approach for ride-matching and routeing with commuters' dynamic mode choice. *International Journal of Production Research*, 1–19.
- Guo, Y., Goncalves, G., & Hsu, T. (2013). A multi-destination daily carpooling problem and an ant colony based resolution method. *RAIRO-Operations Research*, 47(4), 399–428.
- Herbawi, W. M., & Weber, M. (2012a). A genetic and insertion heuristic algorithm for solving the dynamic ridematching problem with time windows. In *Proceedings of the 14th Annual Conference on Genetic and Evolutionary Computation* (pp. 385–392).
- Herbawi, W., & Weber, M. (2011a). Ant colony vs. genetic multiobjective route planning in dynamic multi-hop ridesharing. In *2011 IEEE 23rd International Conference on Tools with Artificial Intelligence* (pp. 282–288). IEEE.
- Herbawi, W., & Weber, M. (2011b). Comparison of multiobjective evolutionary algorithms for solving the multiobjective route planning in dynamic multi-hop ridesharing. In *2011 IEEE Congress of Evolutionary Computation (CEC)* (pp. 2099–2106). IEEE.
- Herbawi, W., & Weber, M. (2011c). Evolutionary multiobjective route planning in dynamic multi-hop ridesharing. In *Proceedings of the European Conference on Evolutionary Computation in Combinatorial Optimization* (pp. 84–95). Springer, Berlin, Heidelberg.
- Herbawi, W., & Weber, M. (2012b). A genetic local search algorithm for multiobjective time-dependent route planning. In *2012 IEEE Congress on Evolutionary Computation* (pp. 1–7). IEEE.

- Herbawi, W., & Weber, M. (2012c). Modeling the multihop ridematching problem with time windows and solving it using genetic algorithms. In *2012 IEEE 24th International Conference on Tools with Artificial Intelligence* (Vol. 1, pp. 89–96). IEEE.
- Herbawi, W., & Weber, M. (2012d). The ridematching problem with time windows in dynamic ridesharing: A model and a genetic algorithm. In *2012 IEEE Congress on Evolutionary Computation* (pp. 1–8). IEEE.
- Hosni, H., Naoum-Sawaya, J., & Artail, H. (2014). The shared-taxi problem: formulation and solution methods. *Transportation Research Part B: Methodological*, 70, 303–318.
- Hou, L., Li, D., & Zhang, D. (2018). Ride-matching and routing optimisation: models and a large neighbourhood search heuristic. *Transportation Research Part E: Logistics and Transportation Review*, 118, 143–162.
- Hsieh, F. S., & Zhan, F. M. (2018). A discrete differential evolution algorithm for carpooling. In *2018 IEEE 42nd Annual Computer Software and Applications Conference (COMPSAC)* (Vol. 1, pp. 577–582). IEEE.
- Hsieh, F. S., Zhan, F. M., & Guo, Y. H. (2019). A solution methodology for carpooling systems based on double auctions and cooperative coevolutionary particle swarms. *Applied Intelligence*, 49(2), 741–763.
- Huang, C., Zhang, D., Si, Y. W., & Leung, S. C. (2016). Tabu search for the real-world carpooling problem. *Journal of Combinatorial Optimization*, 32(2), 492–512.
- Huang, H., Bucher, D., Kissling, J., Weibel, R., & Raubal, M. (2018b). Multi-modal route planning with public transport and carpooling. *IEEE Transactions on Intelligent Transportation Systems*, 20(9), 3513–3525.
- Huang, S. C., Jiau, M. K., & Chong, K. H. (2017). A heuristic multi-objective optimisation algorithm for solving the carpool services problem featuring high-occupancy-vehicle itineraries. *IEEE Transactions on Intelligent Transportation Systems*, 19(8), 2663–2674.
- Huang, S. C., Jiau, M. K., & Lin, C. H. (2014a). A genetic-algorithm-based approach to solve carpool service problems in cloud computing. *IEEE Transactions on Intelligent Transportation Systems*, 16(1), 352–364.
- Huang, S. C., Jiau, M. K., & Lin, C. H. (2014b). Optimisation of the carpool service problem via a fuzzy-controlled genetic algorithm. *IEEE Transactions on Fuzzy Systems*, 23(5), 1698–1712.
- Huang, S. C., Jiau, M. K., & Liu, Y. P. (2018a). An ant path-oriented carpooling allocation approach to optimise the carpool service problem with time windows. *IEEE Systems Journal*, 13(1), 994–1005.
- Jung, J., Jayakrishnan, R., & Park, J. Y. (2016). Dynamic shared-taxi dispatch algorithm with hybrid-simulated annealing. *Computer-Aided Civil and Infrastructure Engineering*, 31(4), 275–291.
- Kaan, L., & Olinick, E. V. (2013). The vanpool assignment problem: optimization models and solution algorithms. *Computers & Industrial Engineering*, 66(1), 24–40.

- Lee, A., & Savelsbergh, M. (2015). Dynamic ridesharing: is there a role for dedicated drivers? *Transportation Research Part B: Methodological*, 81, 483–497.
- Li, X., Hu, S., Fan, W., & Deng, K. (2018). Modeling an enhanced ridesharing system with meet points and time windows. *PLoS ONE*, 13(5), e0195927.
- Li, Y., & Chung, S. H. (2020). Ride-sharing under travel time uncertainty: robust optimization and clustering approaches. *Computers & Industrial Engineering*, 149, 106601.
- Lin, Y., Li, W., Qiu, F., & Xu, H. (2012). Research on optimization of vehicle routing problem for ride-sharing taxi. *Procedia-Social and Behavioral Sciences*, 43, 494–502.
- Liu, K., & Liu, J. (2020). Optimization approach to improve the ridesharing success rate in the bus ridesharing service. *IEEE Access*, 8, 208296–208310.
- Liu, K., Zhang, J., & Yang, Q. (2019). Bus pooling: A large-scale bus ridesharing service. *IEEE Access*, 7, 74248–74262.
- Lloret-Batlle, R., Masoud, N., & Nam, D. (2017) Peer-to-peer ridesharing with ride-back on high-occupancy-vehicle lanes: toward a practical alternative mode for daily commuting. *Transportation Research Record*, 2668(1):21–28
- Long, J., Tan, W., Szeto, W. Y., & Li, Y. (2018). Ride-sharing with travel time uncertainty. *Transportation Research Part B: Methodological*, 118, 143–171.
- Lotfi, S., Abdelghany, K., & Hashemi, H. (2019). Modeling framework and decomposition scheme for on-demand mobility services with ridesharing and transfer. *Computer-Aided Civil and Infrastructure Engineering*, 34(1), 21–37.
- Lu, W., Liu, L., Wang, F., Zhou, X., & Hu, G. (2020). Two-phase optimization model for ride-sharing with transfers in short-notice evacuations. *Transportation Research Part C: Emerging Technologies*, 114, 272–296.
- Ma, C., He, R., & Zhang, W. (2018b). Path optimization of taxi carpooling. *PLoS ONE*, 13(8), e0203221.
- Ma, R., Yao, L., Song, L., & Jin, M. (2018a). A novel algorithm for peer-to-peer ridesharing match problem. *Neural Computing and Applications*, 31(1), 247–258.
- Ma, T. Y. (2017). On-demand dynamic bi-/multi-modal ride-sharing using optimal passenger-vehicle assignments. In *2017 IEEE International Conference on Environment and Electrical Engineering and 2017 IEEE Industrial and Commercial Power Systems Europe (EEEIC/I&CPS Europe)* (pp. 1–5). IEEE.
- Masoud, N., & Jayakrishnan, R. (2017a). A decomposition algorithm to solve the multi-hop peer-to-peer ride-matching problem. *Transportation Research Part B: Methodological*, 99, 1–29.
- Masoud, N., & Jayakrishnan, R. (2017b). A real-time algorithm to solve the peer-to-peer ride-matching problem in a flexible ridesharing system. *Transportation Research Part B: Methodological*, 106, 218–236.



- Masoud, N., Lloret-Batlle, R., & Jayakrishnan, R. (2017b). Using bilateral trading to increase ridership and user permanence in ridesharing systems. *Transportation Research Part E: Logistics and Transportation Review*, 102, 60–77.
- Masoud, N., Nam, D., Yu, J., & Jayakrishnan, R. (2017a). Promoting peer-to-peer ridesharing services as transit system feeders. *Transportation Research Record*, 2650(1), 74–83.
- Massobrio, R., Fagúndez, G., & Nesmachnow, S. (2016). Multiobjective evolutionary algorithms for the taxi sharing problem. *International Journal of Metaheuristics*, 5(1), 67–90.
- Najmi, A., Rey, D., & Rashidi, T. H. (2017). Novel dynamic formulations for real-time Ridesharing systems. *Transportation Research Part E: Logistics and Transportation Review*, 108, 122–140.
- Nam, D., Yang, D., An, S., Yu, J. G., Jayakrishnan, R., & Masoud, N. (2018). Designing a transit-feeder system using multiple sustainable modes: peer-to-peer (P2P) ridesharing, bike sharing, and walking. *Transportation Research Record*, 2672(8), 754–763.
- Naoum-Sawaya, J., Cogill, R., Ghaddar, B., Sajja, S., Shorten, R., Taheri, N., ... & Wirth, F. (2015). Stochastic optimization approach for the car placement problem in ridesharing systems. *Transportation Research Part B: Methodological*, 80, 173–184.
- Pelzer, D., Xiao, J., Zehe, D., Lees, M. H., Knoll, A. C., & Aydt, H. (2015). A partition-based match making algorithm for dynamic ridesharing. *IEEE Transactions on Intelligent Transportation Systems*, 16(5), 2587–2598.
- Qian, X., Zhang, W., Ukkusuri, S. V., & Yang, C. (2017). Optimal assignment and incentive design in the taxi group ride problem. *Transportation Research Part B: Methodological*, 103, 208–226.
- Regue, R., Masoud, N., & Recker, W. (2016). Car2work: shared mobility concept to connect commuters with workplaces. *Transportation Research Record*, 2542(1), 102–110.
- Ren, C., Wang, J., You, Y., & Zhang, Y. (2020). Routing optimization for shared electric vehicles with ride-sharing. *Complexity*, 2020.
- Santos, D. O., & Xavier, E. C. (2013). Dynamic taxi and ridesharing: a framework and heuristics for the optimization problem. In *Twenty-Third International Joint Conference on Artificial Intelligence*.
- Santos, D. O., & Xavier, E. C. (2015). Taxi and ride sharing: a dynamic dial-a-ride problem with money as an incentive. *Expert Systems with Applications*, 42(19), 6728–6737.
- Simonetto, A., Monteil, J., & Gambella, C. (2019). Real-time city-scale ridesharing via linear assignment problems. *Transportation Research Part C: Emerging Technologies*, 101, 208–232.

- Smet, P. (2019). Ride sharing with flexible participants: a metaheuristic approach for large-scale problems. *International Transactions in Operational Research*, 28(1), 91–118.
- Stiglic, M., Agatz, N., Savelsbergh, M., & Gradisar, M. (2015). The benefits of meeting points in ridesharing systems. *Transportation Research Part B: Methodological*, 82, 36–53.
- Stiglic, M., Agatz, N., Savelsbergh, M., & Gradisar, M. (2016). Making dynamic ride-sharing work: the impact of driver and rider flexibility. *Transportation Research Part E: Logistics and Transportation Review*, 91, 190–207.
- Stiglic, M., Agatz, N., Savelsbergh, M., & Gradisar, M. (2018). Enhancing urban mobility: integrating ride-sharing and public transit. *Computers & Operations Research*, 90, 12–21.
- Su, S., Zhou, F., & Yu, H. (2019). An artificial bee colony algorithm with variable neighborhood search and tabu list for long-term carpooling problem with time window. *Applied Soft Computing*, 85, 105814.
- Sun, Y., & Zhang, L. (2018). Potential of taxi-pooling to reduce vehicle miles traveled in Washington, DC. *Transportation Research Record*, 2672(8), 775–784.
- Tafreshian, A., & Masoud, N. (2020b). Using subsidies to stabilize peer-to-peer ridesharing markets with role assignment. *Transportation Research Part C: Emerging Technologies*, 120, 102770.
- Tafreshian, A., & Masoud, N. (2020a). Trip-based graph partitioning in dynamic ridesharing. *Transportation Research Part C: Emerging Technologies*, 114, 532–553.
- Tamannaei, M., & Irandoost, I. (2019) Carpooling problem: a new mathematical model, branch-and-bound, and heuristic beam search algorithm. *Journal Intelligent Transportation Systems*, 23(3):203–215.
- Wang, X., Agatz, N., & Erera, A. (2018). Stable matching for dynamic ride-sharing systems. *Transportation Science*, 52(4), 850–867.
- Wang, X., Dessouky, M., & Ordonez, F. (2016). A pickup and delivery problem for ridesharing considering congestion. *Transportation Letters*, 8(5), 259–269.
- Wu, C., Shankari, K., Kamar, E., Katz, R., Culler, D., Papadimitriou, C., Horvitz, E., & Bayen, A. (2016). Optimizing the diamond lane: a more tractable carpool problem and algorithms. In *2016 IEEE 19th International Conference on Intelligent Transportation Systems (ITSC)* (pp. 1389–1396). IEEE.
- Xia, J., Curtin, K. M., Li, W., & Zhao, Y. (2015) A new model for a carpool matching service. *PLoS ONE*, 10(6): e0129257
- Yan, S., & Chen, C. Y. (2011a). A model and a solution algorithm for the car pooling problem with pre-matching information. *Computers & Industrial Engineering*, 61(3), 512–524.
- Yan, S., & Chen, C. Y. (2011b). An optimisation model and a solution algorithm for the many-to-many car pooling problem. *Annals of Operations Research*, 191(1), 37–71.

- Yan, S., Chen, C. Y., & Chang, S. C. (2014). A car pooling model and solution method with stochastic vehicle travel times. *IEEE Transactions on Intelligent Transportation Systems*, 15(1), 47–61.
- Yan, S., Chen, C. Y., & Lin, Y. F. (2011). A model with a heuristic algorithm for solving the long-term many-to-many car pooling problem. *IEEE Transactions on Intelligent Transportation Systems*, 12(4), 1362–1373.
- Yan, S., Chen, C. Y., & Wu, C. C. (2012). Solution methods for the taxi pooling problem. *Transportation*, 39(3), 723–748.
- Ye, Q., Ma, C., He, R., Xiao, Q., & Zhang, W. (2015). Multi-objective optimisation for taxi ridesharing route based on non-dominated sorting genetic algorithm. *International Journal of Wireless and Mobile Computing*, 8(3), 262–270.
- Yu, X., Miao, H., Bayram, A., Yu, M., & Chen, X. (2021). Optimal routing of multi-modal mobility systems with ridesharing. *International Transactions in Operational Research*, 28(3), 1164–1189.
- Yu, Y., Wu, Y., & Wang, J. (2019). Bi-objective green ridesharing problem: model and exact method. *International Journal of Production Economics*, 208, 472–482.
- Zhang, L., Ye, Z., Xiao, K., & Jin, B. (2019). A parallel simulated annealing enhancement of the optimal-matching heuristic for ridesharing. In *2019 IEEE International Conference on Data Mining (ICDM)* (pp. 906–915). IEEE.
- Zhang, X., & Zhang, X. (2020). A set-based differential evolution algorithm for QoS-oriented and cost-effective ridesharing. *Applied Soft Computing*, 96, 106618.
- Zhang, X., Zhang, Q., Yuan, Z., Wang, C., & Zhang, L. (2020). The research on planning of taxi sharing route and sharing expenses. *Mathematical Problems in Engineering*, 2020. Article ID 6348578.
- Zhao, M., Yin, J., An, S., Wang, J., & Feng, D. (2018). Ridesharing problem with flexible pickup and delivery locations for app-based transportation service: mathematical modeling and decomposition methods. *Journal of Advanced Transportation*, 2018. Article ID 6430950.
